# Supplementary material for: Discovery of Novel Triazole-Containing Pyrazole Ester Derivatives as Potential Antibacterial Agents
Source: PubMed Central journal article supplement (PMC6480153; doi:10.3390/molecules24071311), 2019-04-03

4a

$^{13}\text{C}$  NMR of compound of 4a ( $\text{CDCl}_3$ )

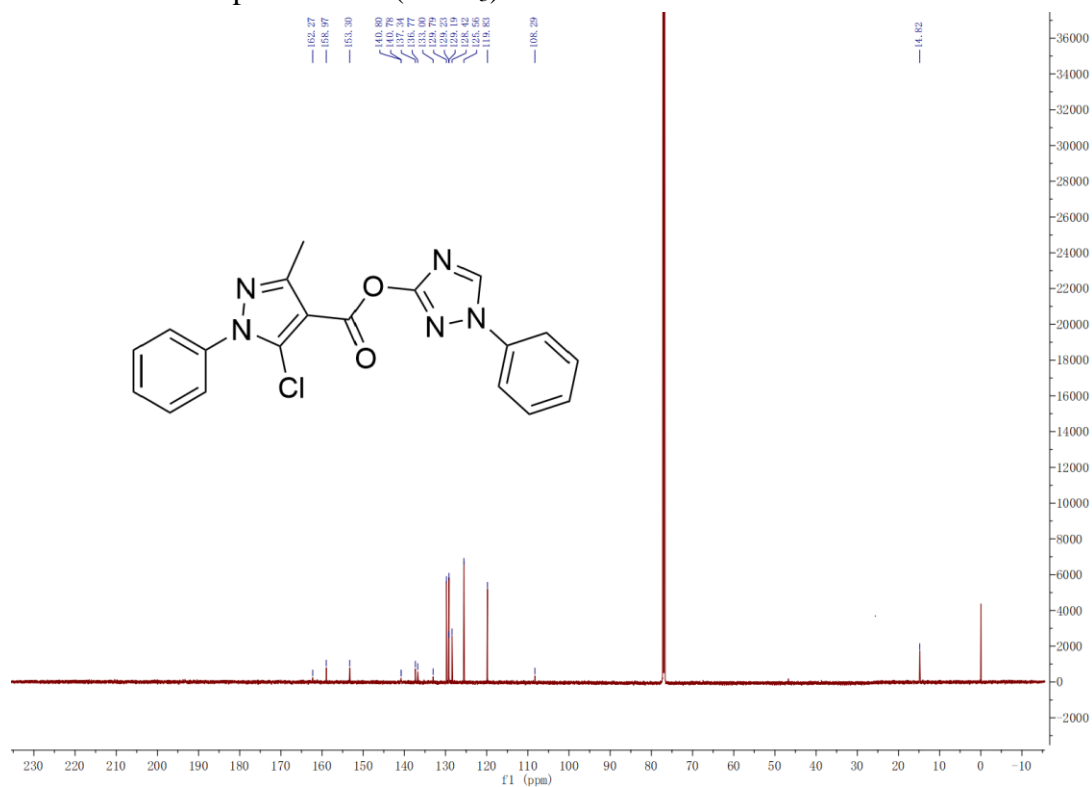

MS (ESI) calculated for  $\text{C}_{19}\text{H}_{14}\text{ClN}_5\text{O}$   $[\text{M}+\text{H}]^+$ , 380.1, found 379.9;

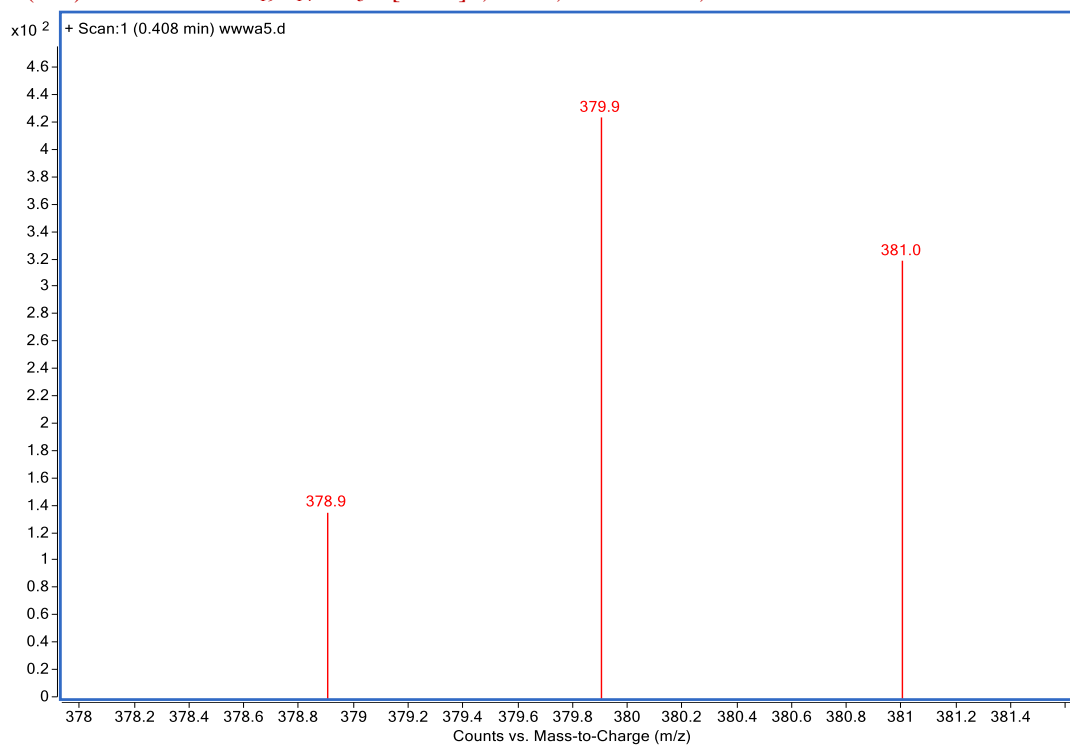

4c

MS (ESI) calculated for  $C_{19}H_{13}Cl_2N_5O_2 [M+H]^+$ , 414.1, found 414.1;

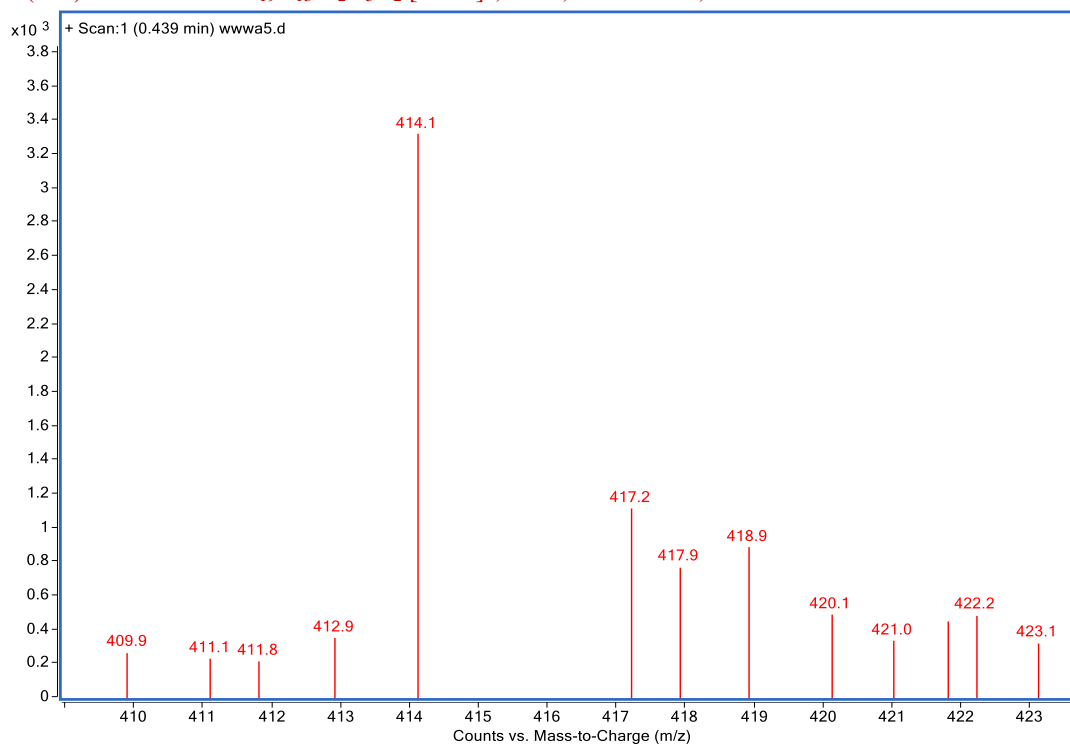

### $^{13}\text{C}$ NMR of compound of 4d ( $\text{CDCl}_3$ )

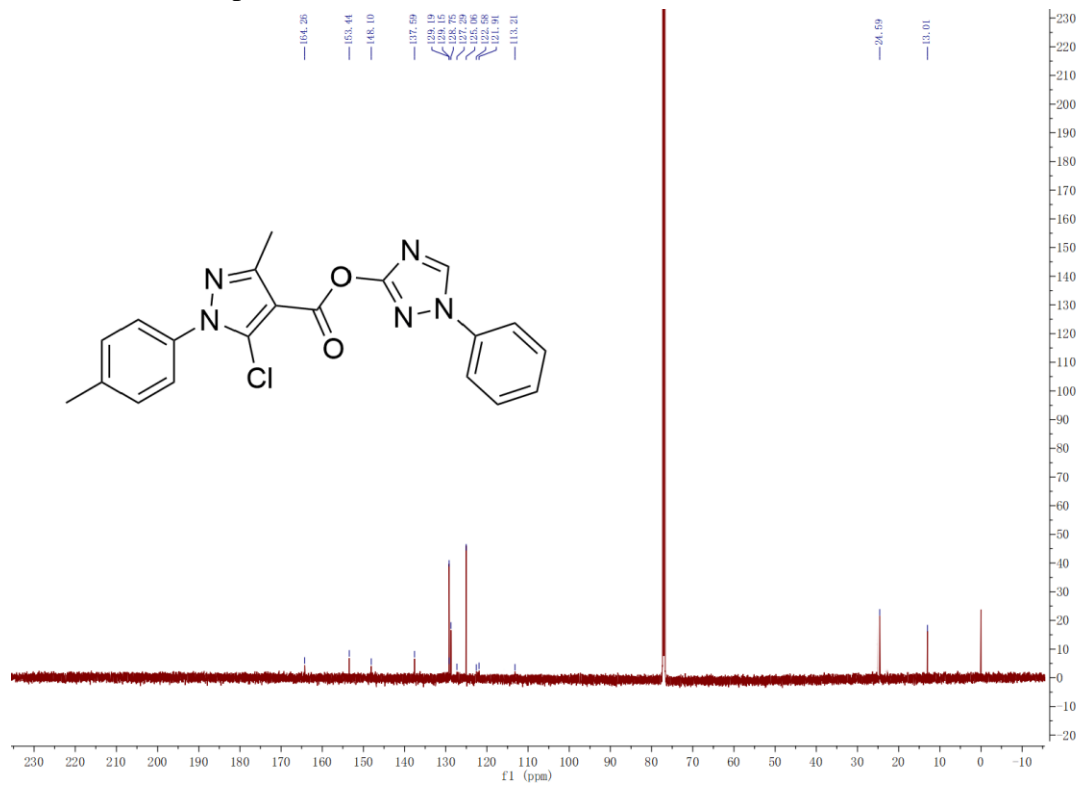

### HRMS of compound of 4d

Sample #39 RT: 0.17 AV: 1 NL: 9.60E6  
T: FTMS + p ESI Full ms [100.0000-500.0000]

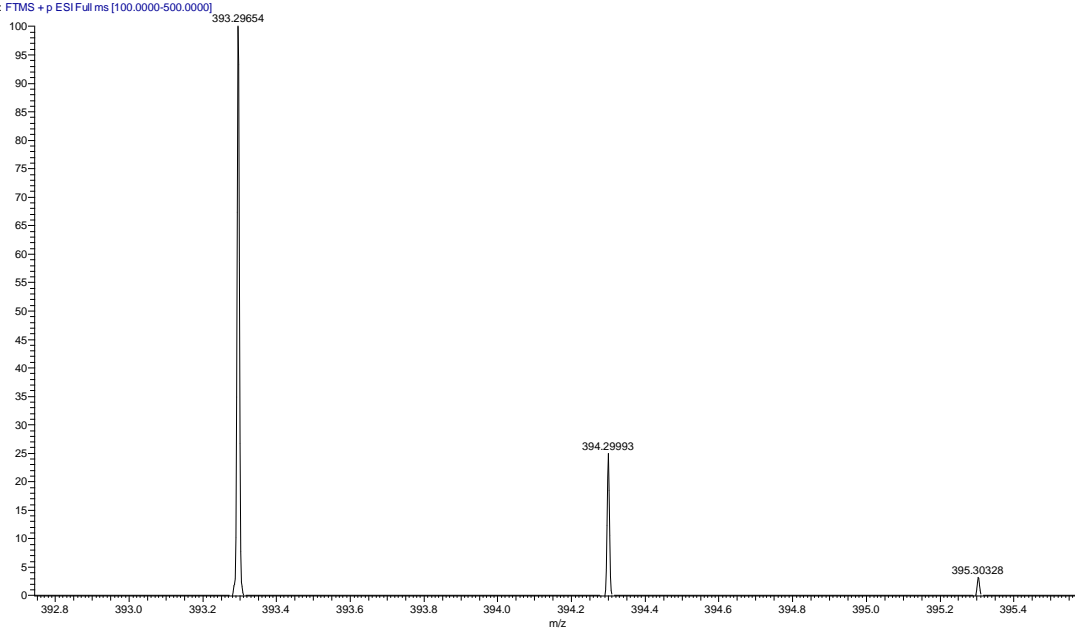

4k

$^{13}\text{C}$  NMR of compound 4k ( $\text{CDCl}_3$ )

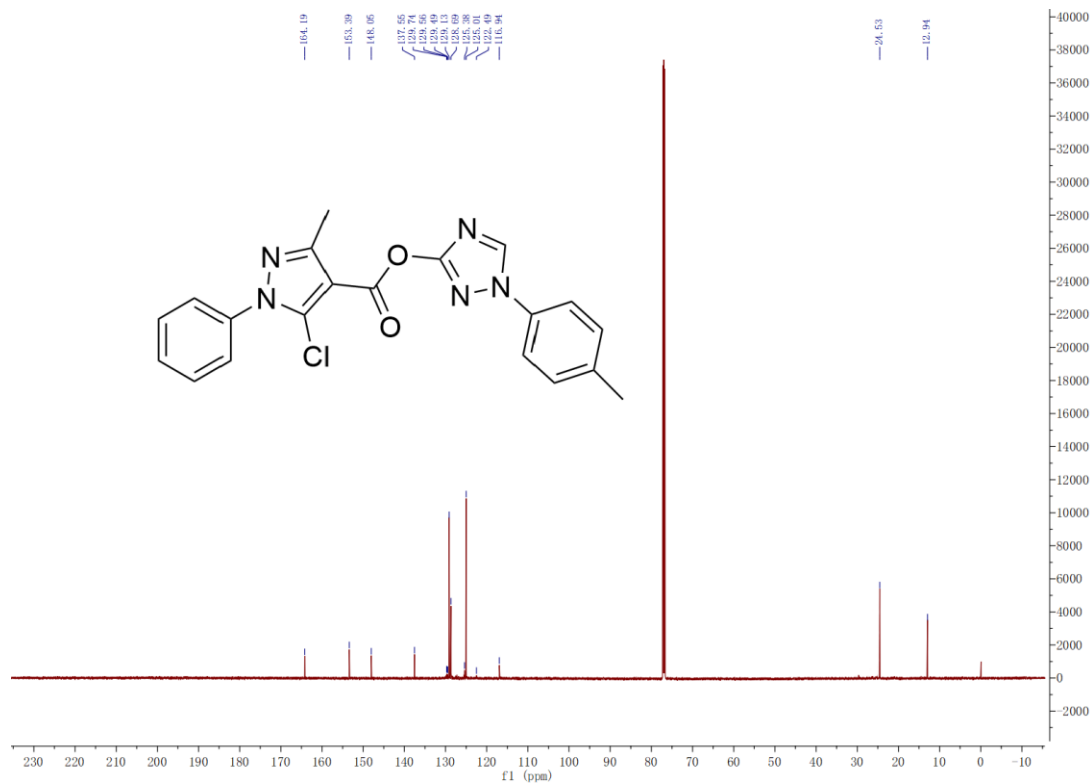

MS (ESI) calculated for  $\text{C}_{20}\text{H}_{16}\text{ClN}_5\text{O}_2$   $[\text{M}+\text{H}]^+$ , 395.1, found 395.1;

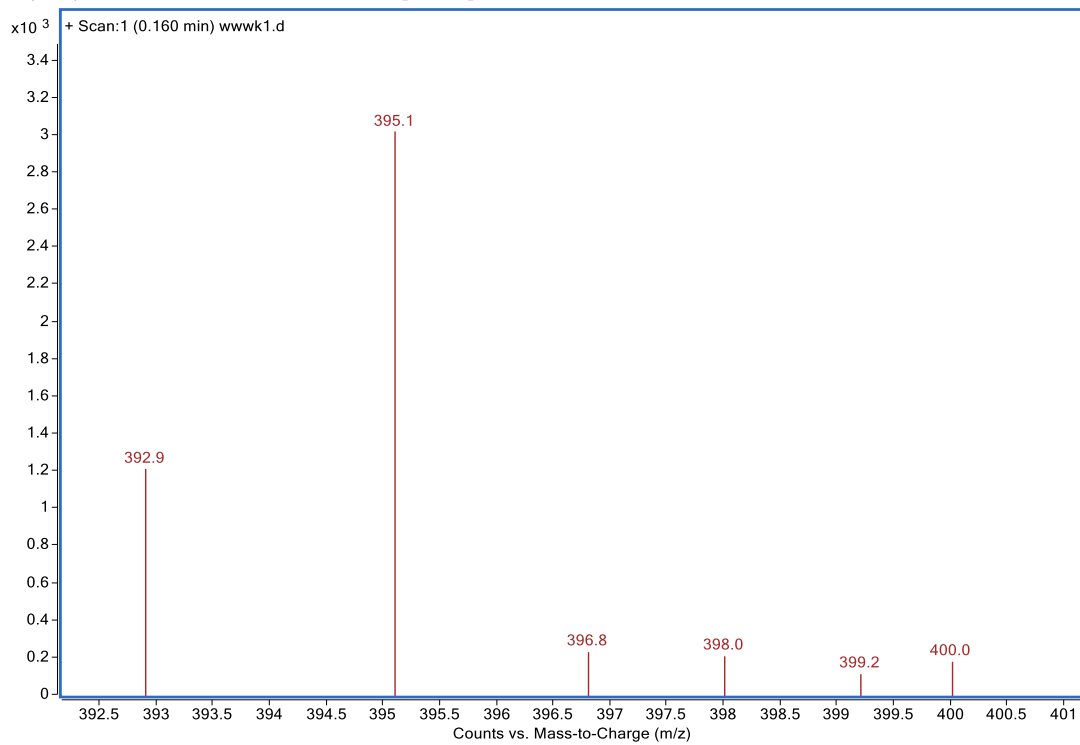

Supplement: molecules-24-01311-s001.pdf [file molecules-24-01311-s001.pdf]
